# Supplementary material for: Magnetic and neutron diffraction studies of the ordered perovskite Ba2NdRuO6
Source: Royal Society of Chemistry journal article supplement (doi:10.1039/b003629n), 2000-01-01
Supplement: b003629n.doc [file b003629n.doc]

**
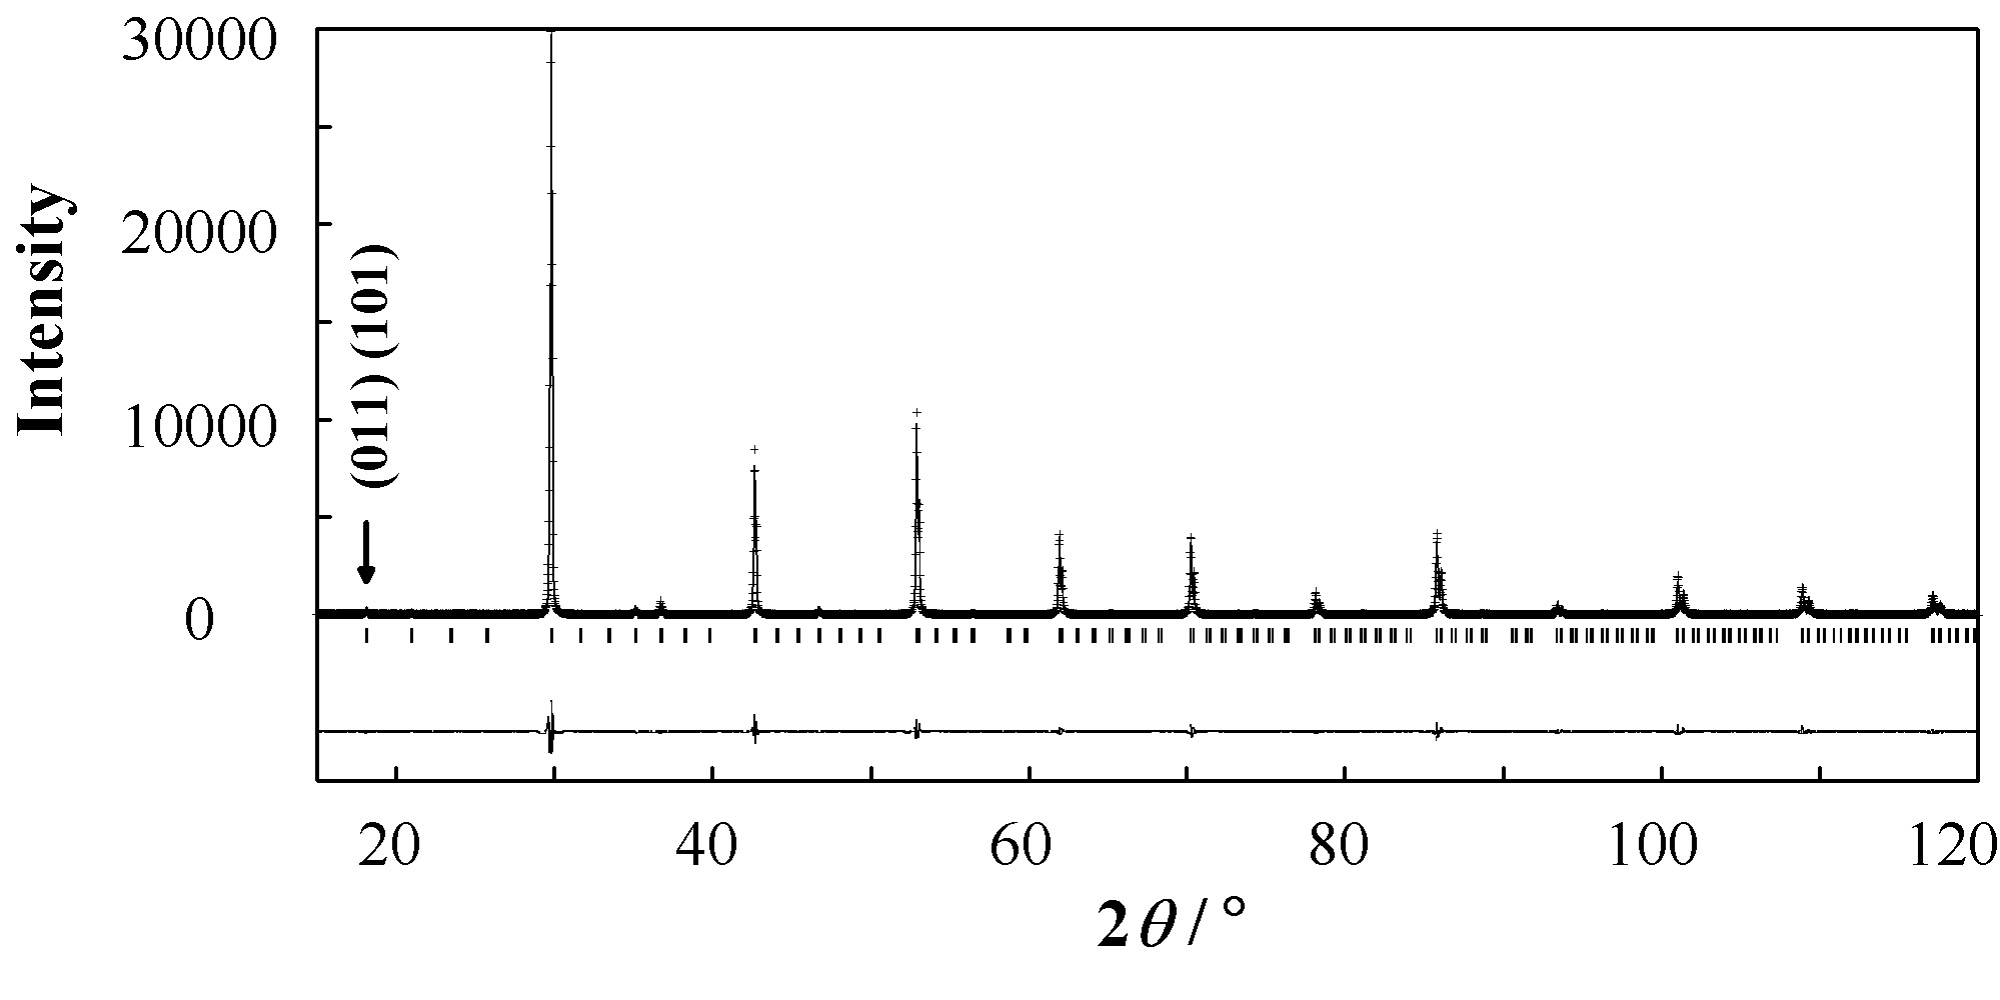
**

**Figure S1** Powder X-ray diffraction profiles for Ba2NdRuO6. The calculated and observed profiles are shown on the top solid line and cross markers, respectively. The vertical marks in the middle show positions calculated for Bragg reflections. The lower trace is a plot of the difference between calculated and observed intensities. The superlattice reflections are shown as an arrow.


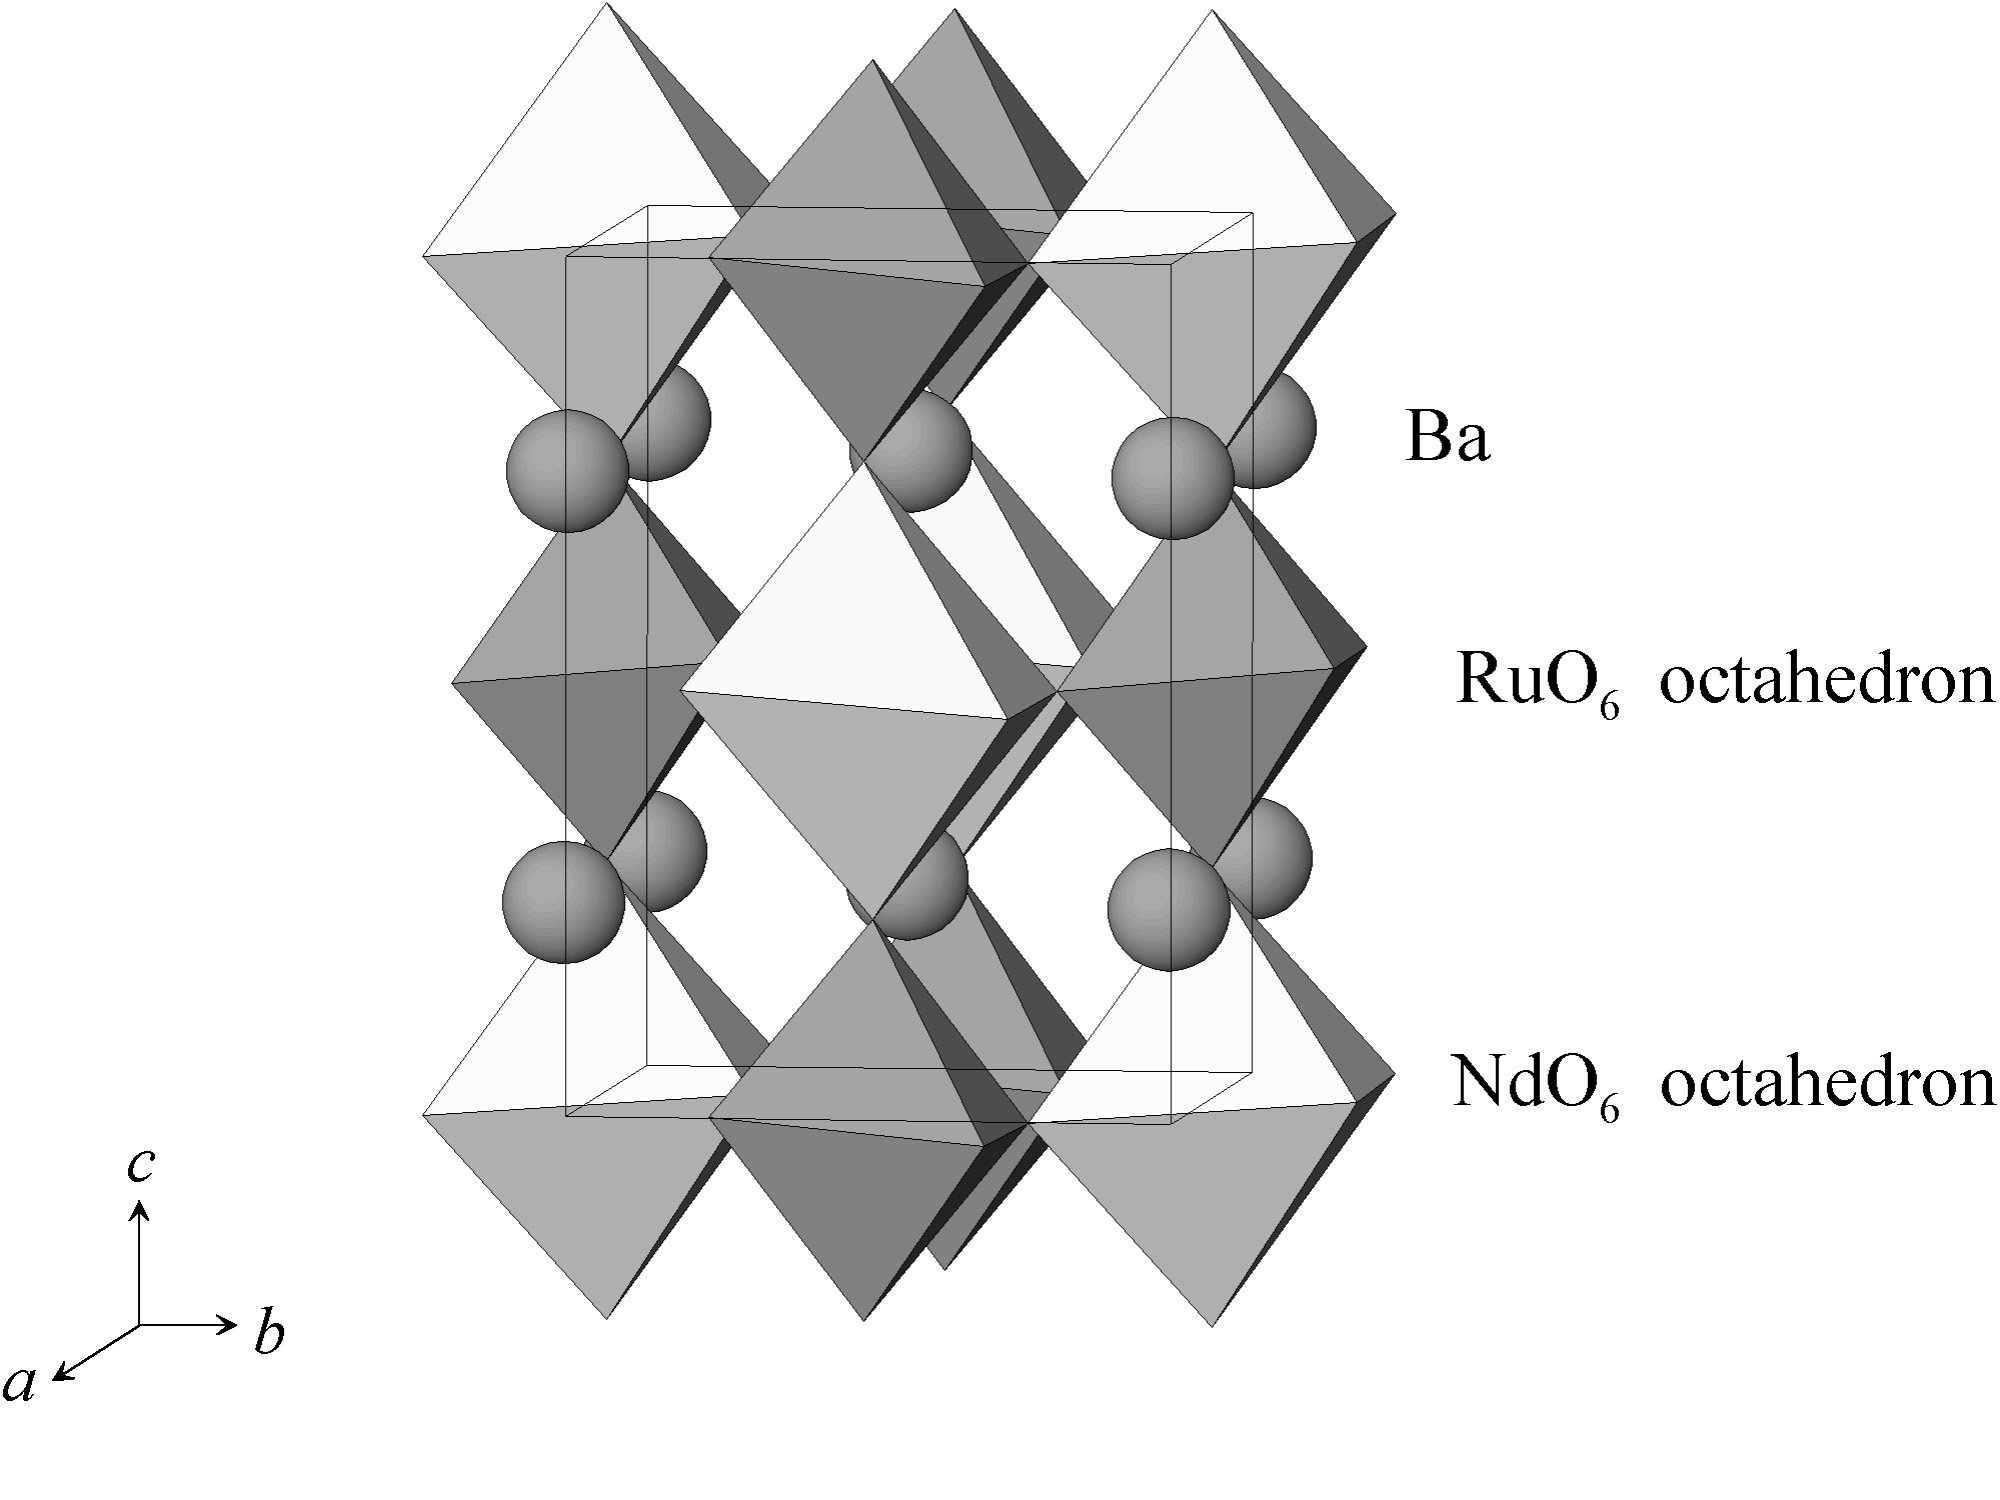


**Figure S2** The crystal structure of Ba2NdRuO6. Spheres are Ba atoms, bright octahedra are NdO6 units and dark octahedra are RuO6 units.


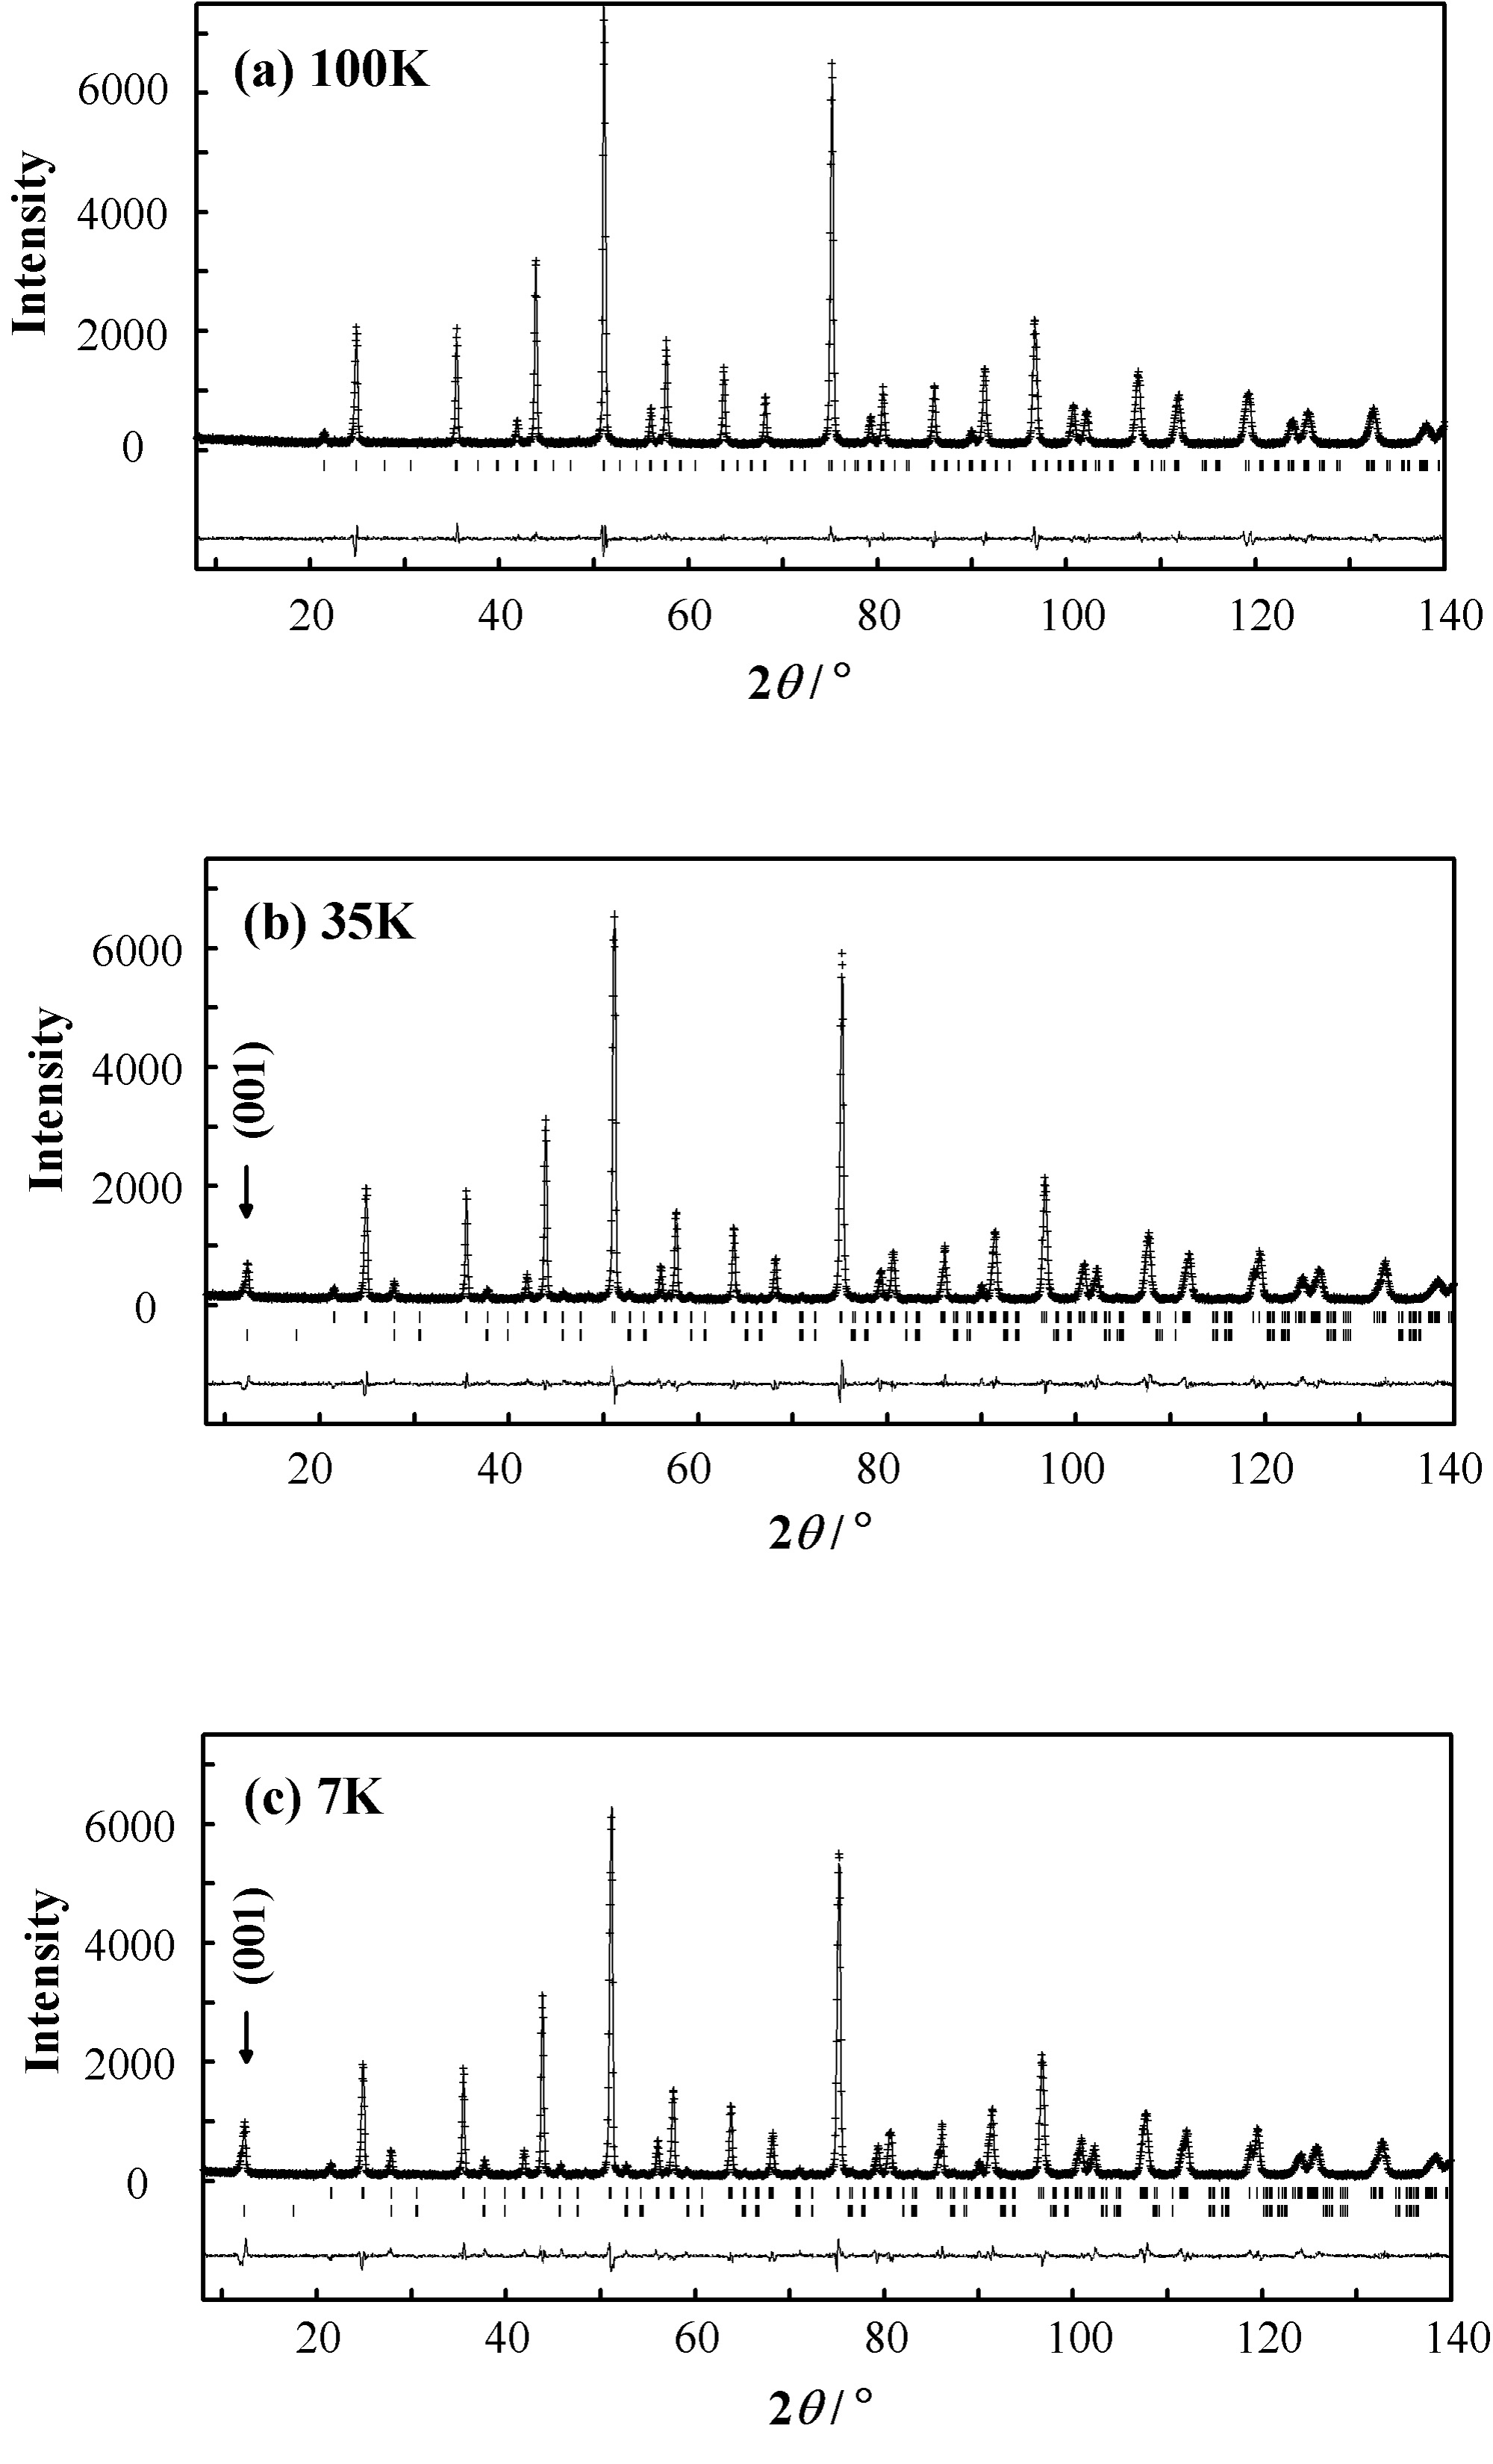


**Figure S3** Powder neutron diffraction profiles for Ba2NdRuO6 at 100K (a), 35K (b) and 7K (c). The calculated and observed profiles are shown on the top solid line and cross markers, respectively. The vertical marks in the middle show positions calculated for Bragg reflections. In (b) and (c), the nuclear reflection positions are shown as upper vertical marks and magnetic ones are shown as lower ones. The lower trace is a plot of the difference between calculated and observed intensities.
